# Supplementary material for: Untargeted Metabolomics Reveals Distinct Metabolic Profiles in MMA Patients with MUT Gene Mutations
Source: Research Square preprint supplement (doi:10.21203/rs.3.rs-6570059/v1), 2025-05-12
Supplement: Supplementary file 1 [file 0073d6b10cc19d2f368ad43e.xlsx]

## Sheet: Table S1 
Compound	Retention Time	m/z	Accepted Compound ID	Accepted Description	p (Corr) ([MMA] Vs [HC])	FC ([MMA] Vs [HC])	Log FC ([MMA] Vs [HC])	Regulation ([MMA] Vs [HC])
12.14_351.2188m/z	12.1395	351.219	CSID4444059	(-)-Prostaglandin E2	1.355055E-7	5.09178	2.34817	up
7.56_274.1842m/z	7.5567	274.184	HMDB0241124	(3Z,5E,7E)-Decatrienoylcarnitine	0.00477338	2.2956	1.19887	up
15.53_526.3112m/z	15.5337	526.311	HMDB0241611	(4Z,7Z,10Z,13Z,16Z)-19,20-Dihydroxydocosa-4,7,10,13,16-pentaenoylcarnitine	0.0353176	2.03348	1.02395	up
13.28_359.2232m/z	13.2823	359.223	HMDB0062285	(4Z,7Z,9E,13Z,16Z,19Z)-11-Hydroperoxydocosahexaenoic acid	9.31936E-8	8.71871	3.12412	up
13.58_287.6396m/z	13.5804	287.64	HMDB0241822	(5Z)-7-[(1R,2R,3R)-3-Hydroxy-2-[(1E,3S)-3-hydroxy-5-phenylpent-1-en-1-yl]-5-oxocyclopentyl]hept-5-enoylcarnitine	3.4489005E-8	5.84558	2.54735	up
12.39_250.0607m/z	12.3917	250.061	HMDB0062623	(6R)-5,10-methenyltetrahydrofolate	0.0108634	2.71784	1.44246	up
9.17_431.2234m/z	9.17374	431.223	HMDB0062320	1-(9Z,12Z,15Z-octadecatrienoyl)-glycero-3-phosphate	2.959933E-5	3.08811	1.62672	up
12.09_243.1624m/z	12.088	243.162	HMDB0002327	1,11-Undecanedicarboxylic acid	6.132435E-4	2.76567	1.46763	up
15.50_320.2353n	15.4994	319.228	HMDB0004673	11,12-Epoxyeicosatrienoic acid	2.7696378E-13	9.64489	3.26976	up
13.59_333.2087m/z	13.5908	333.209	HMDB0060041	11b-PGE2	0.00116277	2.69274	1.42907	up
13.15_295.2300m/z	13.1451	295.23	HMDB0029998	12-Hydroxy-8,10-octadecadienoic acid	1.3198527E-4	5.53253	2.46794	up
13.44_359.2234m/z	13.4366	359.223	HMDB0002265	14,15-DiHETrE	3.9144632E-7	5.41458	2.43685	up
14.06_359.2176m/z	14.0604	359.218	HMDB0012580	14-Hydroxy-E4-neuroprostane	0.00455306	2.40084	1.26354	up
13.03_351.2182m/z	13.0251	351.218	CSID4446212	15(R)-Prostaglandin E2	3.8530557E-6	4.67202	2.22405	up
13.68_359.2178m/z	13.6832	359.218	HMDB0004244	15(S)-HPETE	0.00632232	2.44311	1.28872	up
15.64_343.2291m/z	15.6365	343.229	HMDB0005045	15(S)-Hydroxyeicosatrienoic acid	2.5464772E-8	4.69479	2.23106	up
14.31_337.2391m/z	14.3051	337.239	HMDB0060106	15-Hydroperoxyeicosa-8Z,11Z,13E-trienoate	0.00780083	2.28837	1.19432	up
20.00_353.2049m/z	19.9983	353.205	HMDB0244724	16-Hydroxypregnenolone	0.0248716	2.08913	-1.0629	down
15.91_285.2189m/z	15.9121	285.219	HMDB0012598	17-HETE	5.3819804E-5	4.67049	2.22357	up
5.98_193.1006m/z	5.97952	193.101	HMDB0000319	18-Hydroxycorticosterone	0.02257	2.06857	-1.04864	down
14.13_361.2394m/z	14.1337	361.239	HMDB0010214	19,20-DiHDPA	5.0427637E-4	2.70425	1.43523	up
11.58_369.2294m/z	11.5794	369.229	HMDB0062746	19-hydroxyprostaglandin H1(1-)	0.00995415	2.51993	1.33338	up
16.70_178.0976m/z	16.6952	178.098	HMDB0062319	1-dodecanoyl-glycero-3-phosphate	0.00308947	2.14924	1.10383	up
13.61_278.6363m/z	13.6147	278.636	CSID34999684	1-heptadecanoyl-sn-glycero-3-phosphoserine	1.4311917E-6	3.71583	1.89368	up
13.68_477.3255m/z	13.6766	477.325	CSID405288	1-Palmitoyl-sn-glycero-3-phosphocholine	0.00955221	2.16717	1.11581	up
3.53_175.0619m/z	3.53382	175.062	HMDB0002025	2,3-Dimethyl-3-hydroxyglutaric acid	0	16	4	up
3.53_137.0260m/z	3.53382	137.026	HMDB0059731	2,3-Methyleneglutaric acid	0.00788305	2.01796	1.0129	up
11.41_367.2141m/z	11.408	367.214	HMDB0012635	20-dihydroxyleukotriene B4	2.0167761E-4	3.84441	1.94276	up
15.55_452.2123m/z	15.5508	452.212	HMDB0012642	20-Oxo-leukotriene E4	0.00308518	2.64312	1.40224	up
10.25_383.2101m/z	10.248	383.21	HMDB0012643	20-Trihydroxy-leukotriene-B4	5.3441156E-8	4.2972	2.1034	up
0.89_191.0569m/z	0.89385	191.057	HMDB0029747	2-Amino-5-phenylpyridine	0.0015389	2.3207	-1.21456	down
0.91_149.0453m/z	0.911	149.045	HMDB0000366	2-Deoxyribonic acid	0.0432303	2.07072	1.05013	up
1.30_187.0420m/z	1.29957	187.042	CSID7822131	2-hydroxy-3-methylbenzylidenepyruvic acid	1.7577091E-6	3.61142	1.85256	up
14.69_283.2602m/z	14.689	283.26	HMDB0062549	2-Hydroxystearic acid	0.013606	2.03267	1.02338	up
12.69_321.1507m/z	12.688	321.151	HMDB0000010	2-Methoxyestrone	0.00297892	2.20228	1.139	up
5.27_159.0664m/z	5.27095	159.066	HMDB0029167	2-Methyladipic acid	3.8530557E-6	3.42253	1.77506	up
15.91_257.1831m/z	15.9121	257.183	HMDB0030924	2-Tetradecanone	7.176738E-4	3.09064	1.62791	up
1.87_276.0209m/z	1.86527	276.021	CSID155641	3-(Sulfooxy)-L-tyrosine	0.0028169	2.05541	-1.03943	down
5.94_151.0393m/z	5.9395	151.039	HMDB0000318	3,4-Dihydroxyphenylglycol	1.2642168E-10	6.52592	2.70618	up
11.15_193.0889m/z	11.1509	193.089	HMDB0059744	3,4-Methyleneazelaic acid	2.959933E-5	2.14377	-1.10015	down
4.61_369.2108m/z	4.6081	369.211	HMDB0000353	3b,15b,17a-Trihydroxy-pregnenone	0	16	4	up
3.62_194.0472m/z	3.61953	194.047	HMDB0006116	3-Hydroxyhippuric acid	0.00848759	2.54861	1.34971	up
9.12_278.1760m/z	9.12278	278.176	HMDB0241770	3-Hydroxynona-5,7-dienoylcarnitine	0.00455306	2.24878	1.16915	up
12.39_248.0634m/z	12.3917	248.063	HMDB0002096	3-Indolebutyric acid	4.3338325E-4	2.9885	1.57942	up
14.31_386.3244m/z	14.3118	386.324	HMDB0040529	3-Methylbutyl pentanoate	9.797681E-5	3.0896	1.62742	up
16.11_369.2506m/z	16.1109	369.251	HMDB0000476	3-Oxo-4,6-choladienoic acid	0.00147157	2.32197	-1.21535	down
15.88_405.2682m/z	15.8766	405.268	HMDB0000502	3-Oxocholic acid	0.0216574	2.0668	-1.0474	down
14.41_424.3414m/z	14.4147	424.341	HMDB0241559	3-Oxooctadecanoylcarnitine	0.00278621	3.12427	1.64352	up
5.89_258.1695m/z	5.8938	258.169	HMDB0241668	4-Hexenoylcarnitine	7.0980174E-4	3.02578	1.59731	up
13.16_459.2096m/z	13.1623	459.21	HMDB0010315	4-Hydroxyandrostenedione glucuronide	4.7470403E-5	3.0851	-1.62532	down
6.88_304.2058m/z	6.87667	304.206	HMDB0241743	4-Hydroxyoctanoylcarnitine	0.00538324	2.92115	1.54654	up
13.70_316.1986n	13.7004	317.206	HMDB0006254	4-Hydroxyretinoic acid	0.00360226	2.18139	1.12525	up
8.80_159.1027m/z	8.80231	159.103	CSID118528	4-Hydroxyvalproic acid	3.6917666E-6	3.2827	1.71488	up
2.66_183.0531n	2.65955	166.05	HMDB0000017	4-Pyridoxic acid	0.0233387	2.68073	1.42263	up
15.33_319.2283m/z	15.328	319.228	CSID8038582	5-HETE	1.018873E-5	4.73509	2.24339	up
5.33_202.5842m/z	5.3281	202.584	HMDB0241088	5-Hydroxydec-7-enedioylcarnitine	0.0192055	2.44772	-1.29144	down
6.23_192.0658m/z	6.23095	192.066	HMDB0000763	5-Hydroxyindoleacetic acid	0.00434162	3.82482	1.93539	up
13.17_394.2884m/z	13.1746	394.288	HMDB0240826	5-Methyltridecanoylcarnitine	0.00541398	3.15737	1.65872	up
12.86_334.2163n	12.8594	333.209	HMDB0062423	5-oxo-12-HETE	2.986436E-5	3.98649	1.99512	up
8.07_263.0716m/z	8.07105	263.072	HMDB0062425	5-S-glutathionyl-L-DOPA	0.00115722	2.89912	1.53562	up
4.80_259.0168m/z	4.79666	259.017	HMDB0062793	6-(2-amino-2-carboxyethyl)-4-hydroxybenzothiazole	7.5318606E-4	2.29071	-1.1958	down
1.64_151.0253m/z	1.64242	151.025	HMDB0001182	6,8-Dihydroxypurine	0.0151754	2.70775	1.43709	up
9.17_339.1018n	9.17422	362.091	HMDB0010362	6-Hydroxy-5-methoxyindole glucuronide	0.00868927	2.55589	1.35383	up
5.98_288.1988n	5.97952	289.206	HMDB0031885	6-Hydroxypentadecanedioic acid	0.0452046	2.44884	-1.2921	down
17.65_708.1174m/z	17.6501	708.117	HMDB0304239	7,8-dihydroneopterin 3'-phosphate	0.00600266	3.1615	-1.66061	down
11.56_469.2310m/z	11.5623	469.231	HMDB0002421	7-Sulfocholic acid	0.00426151	2.1889	1.13021	up
13.45_351.2184m/z	13.4537	351.218	HMDB0004710	9,10,13-TriHOME	0.00592053	2.32671	1.21829	up
11.29_329.2341m/z	11.288	329.234	HMDB0004708	9,12,13-TriHOME	8.139864E-5	3.20858	1.68193	up
10.28_227.1311m/z	10.2823	227.131	CSID4472313	9,12-Dioxododecanoic acid	0.00146003	2.76318	1.46633	up
15.52_321.2424m/z	15.5165	321.242	HMDB0061661	9-hydroxyoctadecanoic acid	3.602683E-7	4.59665	2.20058	up
12.26_369.1746m/z	12.2595	369.175	HMDB0002759	Androsterone sulfate	3.6183887E-4	3.94902	-1.98149	down
13.47_361.2384m/z	13.4709	361.238	HMDB0002082	Bisnorcholic acid	0.00130617	3.0946	1.62975	up
13.82_372.3103m/z	13.8204	372.31	CSID30776567	C14-Carnitine	0.00879711	2.48125	1.31107	up
7.95_1085.5321n	7.9509	1084.52	HMDB0291878	CDP-DG(20:4(8Z,11Z,14Z,17Z)-2OH(5S,6R)/20:2(11Z,14Z))	0	4.76226	2.25165	up
7.10_935.4343n	7.09952	327.473	HMDB0293309	CDP-DG(i-12:0/18:2(10E,12Z)+=O(9))	9.605972E-6	6.09044	2.60655	up
6.76_994.4535m/z	6.75663	994.454	HMDB0293351	CDP-DG(i-12:0/PGE1)	0	16	4	up
16.03_383.5294m/z	16.0321	383.529	HMDB0294395	CDP-DG(i-22:0/20:3(6,8,11)-OH(5))	0.00360226	2.16438	-1.11395	down
14.35_646.4716m/z	14.3461	646.472	HMDB0289973	Cer(d18:0/20:5(5Z,8Z,10E,14Z,17Z)-OH(12))	0.0368184	2.49521	1.31916	up
7.04_487.3104m/z	7.04235	487.31	HMDB0242399	Chenodeoxycholylasparagine	0.0150415	2.05602	-1.03986	down
13.15_520.3055m/z	13.1451	520.306	HMDB0242382	Cholylmethionine	2.5464772E-8	5.64813	2.49777	up
15.59_1131.6674m/z	15.5851	1131.67	HMDB0116977	CL(8:0/8:0/13:0/18:2(9Z,11Z))	0.00479447	2.2293	-1.15659	down
8.11_459.2850m/z	8.10534	459.285	HMDB0083412	CL(a-13:0/18:2(9Z,11Z)/18:2(9Z,11Z)/i-14:0)[rac]	0.0147325	3.16268	-1.66115	down
7.17_542.2732n	7.16809	272.144	HMDB0010320	Cortolone-3-glucuronide	0.028979	3.21747	-1.68593	down
5.83_385.2432m/z	5.82523	385.243	HMDB0007004	CPA(18:0/0:0)	1.2158096E-4	3.86604	1.95086	up
13.49_399.2236m/z	13.488	399.224	HMDB0007006	CPA(18:1(9Z)/0:0)	0.0106518	2.43444	-1.28359	down
1.20_410.0289m/z	1.19672	410.029	HMDB0001508	dADP	4.5964465E-4	2.70333	1.43474	up
11.56_463.2360m/z	11.5623	463.236	HMDB0010327	Dehydroisoandrosterone 3-glucuronide	0.00130617	2.50821	1.32666	up
11.73_471.2449m/z	11.7337	471.245	HMDB0296921	DG(2:0/0:0/PGJ2)	2.653387E-4	3.3417	1.74058	up
15.52_485.2852m/z	15.5165	485.285	HMDB0296933	DG(2:0/0:0/TXB2)	0.00735755	2.44259	-1.28841	down
6.54_450.2569n	6.53952	237.127	HMDB0296919	DG(2:0/PGJ2/0:0)	0.00325128	2.9249	-1.54839	down
11.92_645.5344m/z	11.9174	645.534	HMDB0056089	DG(22:0/0:0/14:1n5)	0	38.0469	5.24971	up
15.50_639.4638m/z	15.4994	639.464	HMDB0295328	DG(22:6(5Z,8E,10Z,13Z,15E,19Z)-2OH(7S, 17S)/15:0/0:0)	0	16	4	up
15.72_577.3705m/z	15.7223	577.371	HMDB0297258	DG(PGF1alpha/0:0/8:0)	0.0247108	2.206	1.14144	up
16.03_591.3489m/z	16.0251	591.349	HMDB0297140	DG(TXB2/8:0/0:0)	0.0128201	2.0766	-1.05422	down
15.00_363.2174m/z	15.0023	363.217	HMDB0003259	Dihydrocortisol	8.981422E-4	2.71163	1.43916	up
3.95_145.0508m/z	3.94523	145.051	CSID62321	Dimethyl methylmalonate	1.921715E-4	2.26642	1.18042	up
0.86_195.0525m/z	0.859566	195.053	HMDB0242119	D-Mannonic acid	5.3024527E-5	2.99082	1.58054	up
15.76_191.6021m/z	15.7577	191.602	HMDB0241271	Dodeca-3,6,9-trienoylcarnitine	5.606923E-4	2.02375	1.01703	up
1.30_382.9982m/z	1.29957	382.998	HMDB0001274	dTDP	2.4878069E-5	3.00916	1.58936	up
14.22_363.2553m/z	14.2194	363.255	HMDB0242141	Eicosanedioic acid	0.0117626	2.63195	1.39613	up
15.89_302.2229n	15.895	303.23	HMDB0001999	Eicosapentaenoic acid	5.3819804E-5	2.54928	1.35009	up
11.05_367.1586m/z	11.048	367.159	HMDB0013230	Epitestosterone sulfate	2.0084362E-5	3.91088	-1.96749	down
10.04_427.1851m/z	10.0423	427.185	HMDB0004483	Estrone glucuronide	0.00669931	2.20495	1.14074	up
7.54_145.0693m/z	7.53955	145.069	HMDB0037620	Ethyl 4-(methylthio)butyrate	0.00537957	2.07074	1.05015	up
11.70_465.2521m/z	11.6995	465.252	HMDB0004484	Etiocholanolone glucuronide	0.00312903	2.64048	1.4008	up
10.01_369.1760m/z	10.008	369.176	HMDB0013232	Etiocholanolone sulfate	0.00153231	3.19651	-1.6765	down
8.87_259.0253m/z	8.8709	259.025	HMDB0000124	Fructose 6-phosphate	1.2005908E-4	3.89071	1.96003	up
8.27_183.0779m/z	8.27113	183.078	HMDB0006248	gamma-Glutamylalanine	0.0484942	2.0225	1.01614	up
0.89_204.0787n	0.89385	225.053	HMDB0011667	gamma-Glutamylglycine	6.3239297E-10	3.38829	1.76056	up
4.70_261.1430m/z	4.69954	261.143	HMDB0011171	gamma-Glutamylleucine	1.647597E-4	3.07346	1.61986	up
2.85_246.1232n	2.85383	245.116	HMDB0011172	gamma-Glutamylvaline	1.363214E-12	5.33289	2.41492	up
15.40_1170.6778n	15.3965	1151.66	HMDB0004900	Ganglioside GA1 (d18:1/12:0)	0.0146804	2.08686	-1.06134	down
8.16_502.3089m/z	8.15675	502.309	HMDB0004946	Ganglioside GM2 (d18:1/25:0)	0.0081897	3.10794	-1.63596	down
15.40_1126.6855n	15.3965	1107.67	HMDB0011914	Ganglioside GM3 (d18:0/14:0)	0.00220752	2.69606	-1.43085	down
4.20_259.1318m/z	4.19669	259.132	HMDB0028822	Glutamylisoleucine	4.2148583E-11	5.10687	2.35244	up
0.91_247.0951m/z	0.911	247.095	HMDB0028829	Glutamylthreonine	0	28.2779	4.8216	up
15.53_598.2540m/z	15.5337	598.254	HMDB0059793	Gluten exorphin A5	4.0633535E-7	3.10021	1.63237	up
16.14_291.2191m/z	16.1351	291.219	HMDB0040168	Glycerol 1-(5-hydroxydodecanoate)	0.00801681	2.35812	1.23764	up
13.58_535.3256n	13.5804	536.333	GPCho(14:1/4:0)	GPCho(14:1/4:0)	1.7534907E-4	2.89588	1.534	up
15.52_552.3103m/z	15.5165	552.31	GPEtn(18:4/6:0)	GPEtn(18:4/6:0)	1.2209924E-4	2.88451	-1.52833	down
15.40_588.3301m/z	15.3965	588.33	GPSer(14:1/9:0)	GPSer(14:1/9:0)	0.00283994	2.13565	-1.09467	down
15.83_614.3459m/z	15.8251	614.346	GPSer(17:2/8:0)	GPSer(17:2/8:0)	0.00781286	2.31455	-1.21073	down
4.56_202.1203n	4.5624	244.154	HMDB0059719	Heptylmalonic acid	1.4861001E-4	4.25121	2.08787	up
16.51_166.0967m/z	16.5067	166.097	HMDB0000672	Hexadecanedioic acid	6.0152735E-5	3.00147	1.58567	up
13.26_272.2576m/z	13.2604	272.258	HMDB0242181	Hexadecasphingosine	0.0104565	2.84184	-1.50683	down
6.63_260.1854m/z	6.62524	260.185	HMDB0000756	Hexanoylcarnitine	0.0264956	2.42641	1.27882	up
1.88_347.0329m/z	1.88242	347.033	HMDB0000175	Inosinic acid	0	16	4	up
5.72_245.1855m/z	5.72238	245.186	HMDB0028910	Isoleucyl-Isoleucine	1.276722E-6	5.36599	2.42385	up
1.09_186.1112m/z	1.09387	186.111	HMDB0000201	L-Acetylcarnitine	0.00114686	3.27683	-1.7123	down
14.06_318.2175n	14.0604	301.214	HMDB0001337	Leukotriene A4	8.1414875E-4	2.8559	1.51395	up
13.63_336.2302n	13.6251	335.223	HMDB0001085	Leukotriene B4	6.2327254E-10	7.96234	2.99319	up
0.84_145.0618m/z	0.842434	145.062	HMDB0000641	L-Glutamine	9.640607E-6	2.2614	-1.17722	down
5.60_280.1494m/z	5.60239	280.149	HMDB0000719	L-Homoserine	0.00573423	2.63239	1.39637	up
1.88_130.0861m/z	1.88242	130.086	HMDB0000172	L-Isoleucine	1.0417569E-4	2.33428	-1.22298	down
14.76_400.3412m/z	14.7576	400.341	HMDB0240774	L-Palmitoylcarnitine	0.00175175	2.58704	1.3713	up
9.02_409.2294m/z	9.01947	409.229	HMDB0007853	LysoPA(16:0/0:0)	6.398149E-4	2.52655	1.33717	up
17.65_433.2391m/z	17.6481	433.239	HMDB0007856	LysoPA(18:2(9Z,12Z)/0:0)	0.0118395	2.3487	1.23186	up
11.19_429.2024m/z	11.1852	429.202	HMDB0114745	LysoPA(18:4(6Z,9Z,12Z,15Z)/0:0)	2.1853484E-6	3.41613	1.77236	up
16.76_254.1286m/z	16.7639	254.129	HMDB0114758	LysoPA(20:2(11Z,14Z)/0:0)	1.5976412E-4	2.39938	-1.26266	down
6.79_508.3467m/z	6.79095	508.347	HMDB0114767	LysoPA(i-20:0/0:0)	0.0424254	2.59927	-1.37811	down
12.65_393.2376m/z	12.6537	393.238	HMDB0011154	LysoPA(P-16:0/0:0)	0.00801681	2.04038	1.02883	up
16.03_481.3148n	16.0321	482.322	HMDB0010381	LysoPC(15:0/0:0)	6.013815E-4	2.8747	1.52341	up
7.39_598.3760m/z	7.39096	598.376	HMDB0010400	LysoPC(22:2(13Z,16Z)/0:0)	0.0328566	2.26475	-1.17935	down
15.17_556.3293m/z	15.1737	556.329	HMDB0011491	LysoPE(0:0/22:1(13Z))	0.00767304	2.1937	1.13337	up
19.74_619.2897m/z	19.7412	619.29	HMDB0061690	LysoPI(20:4(5Z,8Z,11Z,14Z)/0:0)	0.0209847	2.33215	-1.22166	down
16.03_260.6357m/z	16.0321	260.636	HMDB0240605	LysoPS(16:0/0:0)	1.6324233E-5	2.84321	1.50752	up
5.61_383.2325m/z	5.6138	383.233	HMDB0030407	Merodesmosine	0.00571031	2.53082	1.3396	up
12.64_431.2335m/z	12.6366	431.234	HMDB0254648	Methylglutarylcarnitine	0.0021983	2.54562	1.34802	up
1.92_117.0170m/z	1.9167	117.017	HMDB0000202	Methylmalonic acid	0	16	4	up
1.93_169.0487m/z	1.93383	169.049	HMDB0000227	Mevalonic acid	0	16	4	up
13.42_337.2370m/z	13.4194	337.237	HMDB0011532	MG(0:0/15:0/0:0)	2.8664226E-4	3.22144	1.6877	up
16.45_327.2541m/z	16.4537	327.254	HMDB0011534	MG(0:0/16:1(9Z)/0:0)	0.00629692	3.03206	-1.6003	down
14.05_367.2479m/z	14.048	367.248	HMDB0260540	MG(0:0/18:2(10E,12Z)+=O(9)/0:0)	1.2382581E-5	3.54498	1.82578	up
13.57_337.2366m/z	13.5737	337.237	HMDB0011563	MG(15:0/0:0/0:0)	4.5250175E-7	5.74758	2.52295	up
14.79_373.2320m/z	14.7919	373.232	HMDB0011565	MG(16:1(9Z)/0:0/0:0)	0.00217262	2.26703	1.1808	up
6.40_237.1276m/z	6.40237	237.128	HMDB0260478	MG(PGF2alpha/0:0/0:0)	0.00467058	2.74196	-1.45521	down
11.77_417.2151m/z	11.768	417.215	MGDG(2:0/9:0)	MGDG(2:0/9:0)	9.88245E-7	3.5914	1.84455	up
13.41_235.0697m/z	13.4147	235.07	HMDB0062702	N,N'-diacetylchitobiose	0.011678	2.34827	1.2316	up
0.86_165.0630n	0.859566	146.045	HMDB0006040	N2-Methylguanine	3.5609248E-12	4.29268	2.10188	up
1.90_432.1238m/z	1.89955	432.124	HMDB0041623	N6-Carbamoyl-L-threonyladenosine	0	16	4	up
4.56_411.1312m/z	4.55667	411.131	CSID141829	N6-threonylcarbamoyladenosine	7.0348417E-4	2.51168	1.32865	up
3.21_187.1096m/z	3.20812	187.11	HMDB0000446	N-alpha-Acetyl-L-lysine	0	16	4	up
6.08_452.3123m/z	6.07666	452.312	HMDB0242001	N-Arachidonoyl Phenylalanine	0.00785105	4.10567	-2.03762	down
16.52_471.2974m/z	16.5223	471.297	HMDB0242005	N-Arachidonoyl Tryptophan	0.00272099	3.43882	-1.78191	down
5.08_229.1666n	5.07666	212.163	HMDB0013267	N-Decanoylglycine	0.0415571	2.56372	-1.35824	down
11.20_525.2726m/z	11.2023	525.273	HMDB0013021	Neuromedin N (1-4)	0.00327303	2.16375	1.11353	up
17.55_630.0796m/z	17.5471	630.08	HMDB0001179	Nicotinic acid adenine dinucleotide	0.027748	3.01892	-1.59403	down
7.08_236.0950m/z	7.07663	236.095	263655	N-lactoyl-phenylalanine	6.839002E-5	2.90672	1.53939	up
6.29_275.1057m/z	6.2938	275.106	HMDB0062178	N-lactoyl-Tryptophan	1.3076104E-9	4.09555	2.03406	up
15.99_327.2343m/z	15.9909	327.234	HMDB0242031	N-Lauroyl Glutamine	0.0181664	2.09928	-1.06989	down
13.23_370.2936m/z	13.2261	370.294	HMDB0242185	N-Oleoyl-L-Serine	0.0323303	2.4246	1.27774	up
11.94_397.2068m/z	11.9395	397.207	HMDB0241919	N-Palmitoyl Alanine	0.00774154	2.08766	-1.06188	down
12.76_395.1945m/z	12.7566	395.194	HMDB0241920	N-Palmitoyl Arginine	0.00484751	2.04443	-1.0317	down
11.34_253.1459m/z	11.3394	253.146	HMDB0241923	N-Palmitoyl Cysteine	0.0445861	2.08664	1.06118	up
0.86_227.9859m/z	0.859566	227.986	CSID388955	N-Phosphotaurocyamine	7.081987E-11	4.36119	2.12472	up
16.70_285.2132m/z	16.6952	285.213	HMDB0013286	N-Undecanoylglycine	7.317253E-4	2.92107	1.54649	up
13.84_303.2292m/z	13.8375	303.229	HMDB0244277	Octadeca-10,12-dienoic acid	0.0357158	2.58746	1.37154	up
16.80_313.2387m/z	16.7966	313.239	HMDB0000782	Octadecanedioic acid	0.047496	2.0169	-1.01214	down
14.96_426.3572m/z	14.9634	426.357	HMDB0094687	Octadecenoylcarnitine	5.383901E-4	3.30743	1.72571	up
14.55_327.2282m/z	14.5519	327.228	HMDB0240723	Octenoyl-L-carnitine	0.0248716	2.10039	1.07066	up
15.93_305.2447m/z	15.9293	305.245	HMDB0000207	Oleic acid	2.986436E-5	3.26096	1.7053	up
6.79_487.3278m/z	6.79095	487.328	HMDB0114773	PA(10:0/13:0)	0.00537957	4.63426	-2.21234	down
14.48_383.2164m/z	14.4833	383.216	HMDB0263050	PA(14:0/PGF1alpha)	4.953531E-4	2.40207	1.26428	up
15.64_679.4478m/z	15.6434	679.448	HMDB0267574	PA(18:1(12Z)-2OH(9,10)/i-14:0)	0.0457862	2.28042	1.1893	up
13.53_537.2234m/z	13.5289	537.223	HMDB0266547	PA(2:0/20:5(5Z,8Z,11Z,14Z,16E)-OH(18))	0.0266382	2.07888	-1.0558	down
15.59_744.5184n	15.592	767.508	HMDB0264672	PA(20:0/18:1(12Z)-O(9S,10R))	0.0424831	2.03711	1.02653	up
6.79_271.1256m/z	6.79095	271.126	HMDB0266582	PA(20:3(6,8,11)-OH(5)/2:0)	0.0250846	2.40178	-1.26411	down
12.86_627.3779m/z	12.8594	627.378	HMDB0262686	PA(20:3(8Z,11Z,14Z)-2OH(5,6)/10:0)	0.00101304	2.53619	1.34266	up
13.83_607.3470m/z	13.8309	607.347	HMDB0262692	PA(20:4(5Z,8Z,11Z,13E)+=O(15)/10:0)	5.3819804E-5	3.33906	1.73944	up
7.12_462.7277m/z	7.11667	462.728	HMDB0265169	PA(20:4(5Z,8Z,11Z,14Z)/LTE4)	0.00525333	2.78567	1.47802	up
15.60_232.4700m/z	15.6022	232.47	HMDB0267592	PA(20:4(6E,8Z,11Z,13E)-2OH(5S,15S)/i-14:0)	3.6183887E-4	2.87292	-1.52252	down
7.63_796.5090n	7.62527	838.543	HMDB0115422	PA(22:6(4Z,7Z,10Z,13Z,16Z,19Z)/22:4(7Z,10Z,13Z,16Z))	0.0105767	2.73595	-1.45204	down
14.00_611.2882m/z	13.9966	611.288	HMDB0266657	PA(8:0/20:5(7Z,9Z,11E,13E,17Z)-3OH(5,6,15))	2.4831645E-5	4.06728	2.02407	up
4.40_315.1617m/z	4.39667	315.162	HMDB0266631	PA(8:0/5-iso PGF2VI)	0	16	4	up
4.72_239.1643m/z	4.71669	239.164	HMDB0268024	PA(i-18:0/18:3(9,11,15)-OH(13))	0.00965182	2.4478	-1.29149	down
17.87_423.7527m/z	17.8731	423.753	HMDB0263508	PA(LTE4/17:0)	5.0444214E-4	2.41713	1.2733	up
12.76_642.3661n	12.7566	641.359	HMDB0262676	PA(PGJ2/10:0)	0.00116277	2.64993	1.40595	up
10.76_372.2027m/z	10.7573	372.203	HMDB0262987	PA(PGJ2/14:0)	0.0293805	2.27828	1.18795	up
15.50_741.3992m/z	15.4994	741.399	HMDB0262889	PA(TXB2/13:0)	0.013936	2.61778	1.38834	up
12.41_299.1928m/z	12.4088	299.193	HMDB0003229	Palmitoleic acid	0.0279341	2.27909	1.18846	up
16.45_417.2879m/z	16.4537	417.288	HMDB0010331	Palmitoyl glucuronide	0.00123025	3.00277	-1.5863	down
3.45_218.1050m/z	3.44812	218.105	HMDB0000210	Pantothenic acid	3.6659723E-5	2.87688	1.52451	up
15.62_840.5766m/z	15.6194	840.577	HMDB0286237	PC(18:0/PGF2alpha)	0.00478078	2.40339	1.26507	up
18.72_873.5888n	18.7225	872.582	HMDB0286349	PC(18:1(11Z)/TXB2)	0.0142712	2.65964	1.41123	up
13.97_560.3337m/z	13.9747	560.334	HMDB0288857	PC(18:1(12Z)-2OH(9,10)/2:0)	9.88245E-7	5.50231	2.46004	up
14.33_560.3336m/z	14.329	560.334	HMDB0288859	PC(18:1(12Z)-O(9S,10R)/2:0)	4.9467337E-5	4.23856	2.08357	up
7.78_494.2770m/z	7.77957	494.277	HMDB0286449	PC(18:1(9Z)/LTE4)	0.00430413	3.55932	-1.8316	down
15.96_606.3308m/z	15.9623	606.331	HMDB0288878	PC(2:0/22:6(5Z,7Z,10Z,13Z,16Z,19Z)-OH(4))	0.00392603	2.49866	-1.32115	down
10.42_622.3259m/z	10.4195	622.326	HMDB0288870	PC(2:0/22:6(5Z,8E,10Z,13Z,15E,19Z)-2OH(7S, 17S))	0.0146804	2.14534	1.1012	up
13.54_672.3193m/z	13.5394	672.319	HMDB0288840	PC(2:0/TXB2)	0	16	4	up
15.23_812.5471m/z	15.2251	812.547	HMDB0285968	PC(20:4(6E,8Z,11Z,13E)-2OH(5S,15S)/16:0)	0.0142404	2.64888	1.40538	up
18.60_842.5573m/z	18.6025	842.557	HMDB0286144	PC(20:4(7E,9E,11Z,13E)-3OH(5S,6R,15S)/17:0)	4.6373197E-4	3.68102	1.88011	up
7.34_895.5397n	7.33955	860.526	HMDB0289345	PC(DiMe(9,5)/PGE2)	0.00969851	3.54447	-1.82557	down
15.41_838.5628m/z	15.4137	838.563	HMDB0289762	PC(PGE2/P-18:1(9Z))	6.5217976E-4	3.37796	1.75615	up
7.36_797.5358n	7.35669	410.766	HMDB0284709	PE(18:1(9Z)-O(12,13)/DiMe(11,3))	0.0021776	3.75683	-1.90952	down
15.61_723.4817m/z	15.6091	723.482	HMDB0009185	PE(18:4(6Z,9Z,12Z,15Z)/14:1(9Z))	0.0300844	2.66163	1.41231	up
18.86_840.5546m/z	18.8596	840.555	HMDB0009469	PE(20:5(5Z,8Z,11Z,14Z,17Z)/22:1(13Z))	0.0182058	2.41671	1.27305	up
7.75_837.5340n	7.74528	838.541	HMDB0009703	PE(22:6(4Z,7Z,10Z,13Z,16Z,19Z)/22:5(4Z,7Z,10Z,13Z,16Z))	0.00591874	3.59252	-1.845	down
18.62_430.7579m/z	18.6219	430.758	HMDB0284362	PE(22:6(4Z,7Z,10Z,13Z,16Z,19Z)/PGE2)	6.451203E-4	2.40371	1.26526	up
18.02_884.5697m/z	18.0196	884.57	HMDB0283951	PE(6 keto-PGF1alpha/22:2(13Z,16Z))	0.0129942	2.75124	1.46008	up
12.87_801.6589m/z	12.866	801.659	HMDB0011355	PE(P-16:0/22:0)	0	16	4	up
19.45_818.5569m/z	19.4498	818.557	HMDB0261187	PE(PGF1alpha/18:0)	0.00413506	2.99131	1.58078	up
19.30_866.5598m/z	19.2955	866.56	HMDB0283961	PE(TXB2/22:2(13Z,16Z))	8.527395E-5	3.99534	1.99832	up
7.59_504.3202m/z	7.59098	504.32	HMDB0270974	PG(6 keto-PGF1alpha/a-25:0)	0.0252137	2.74708	-1.4579	down
7.20_391.1957m/z	7.20236	391.196	HMDB0271093	PG(i-12:0/5-iso PGF2VI)	0.0267604	2.29152	-1.1963	down
15.69_635.4287m/z	15.6949	635.429	HMDB0116690	PG(i-14:0/a-13:0)	0.0384904	2.40277	1.2647	up
12.36_408.2326m/z	12.3574	408.233	HMDB0271350	PG(i-14:0/PGD1)	0.00388346	2.55546	1.35358	up
7.52_414.2417m/z	7.52242	414.242	HMDB0271387	PG(PGD2/i-15:0)	9.837532E-4	2.49027	-1.3163	down
6.40_413.2412m/z	6.40237	413.241	HMDB0013577	PGP(18:3(9Z,12Z,15Z)/16:0)	0.0439447	2.71218	-1.43945	down
11.71_423.2218m/z	11.7117	423.222	HMDB0013578	PGP(18:3(9Z,12Z,15Z)/16:1(9Z))	0.0477971	2.21741	1.14887	up
7.30_920.4306n	7.2995	919.423	HMDB0273149	PGP(18:3(9Z,12Z,15Z)/PGD2)	2.4831645E-5	3.23424	1.69343	up
8.82_449.2672m/z	8.81994	449.267	HMDB0272599	PGP(20:3(6,8,11)-OH(5)/18:0)	0.00207775	2.63149	1.39588	up
5.97_1057.4648n	5.9738	1056.46	HMDB0274196	PGP(22:6(4Z,7Z,10Z,13Z,16Z,19Z)/LTE4)	0	4.04002	-2.01436	down
8.23_511.2785m/z	8.2254	511.278	HMDB0275992	PGP(i-24:0/20:5(6E,8Z,11Z,14Z,17Z)-OH(5))	0.0303399	2.20973	-1.14387	down
6.79_524.3081m/z	6.79095	524.308	HMDB0274706	PGP(PGE2/a-25:0)	0.0414562	2.58942	-1.37263	down
7.49_964.5595n	7.49383	494.278	HMDB0275855	PGP(PGJ2/i-22:0)	0.0172803	3.17649	-1.66744	down
17.07_577.0723n	17.0726	622.043	HMDB0012278	Phosphoribulosylformimino-AICAR-P	0.0449057	2.58635	-1.37092	down
7.78_466.2973m/z	7.77957	466.297	HMDB0276959	PI(20:0/20:3(5Z,8Z,11Z)-O(14R,15S))	0.00500596	3.26295	-1.70618	down
7.52_466.2987m/z	7.52242	466.299	HMDB0276981	PI(20:0/20:4(5Z,8Z,10E,14Z)-OH(12S))	0.0118395	3.33188	-1.73633	down
7.52_948.6053n	7.52242	971.595	HMDB0277006	PI(20:3(8Z,11Z,14Z)-2OH(5,6)/20:0)	0.00538324	3.4406	-1.78266	down
15.52_507.2620m/z	15.5165	507.262	HMDB0278818	PIP(18:0/PGE1)	0.00363837	2.54348	-1.3468	down
13.25_336.2301n	13.248	335.223	HMDB0002656	Prostaglandin A1	2.3655964E-9	7.99155	2.99848	up
14.01_334.2159n	14.0137	333.209	HMDB0002752	Prostaglandin A2	0.010368	2.52291	1.33509	up
12.14_369.2298m/z	12.1395	369.23	HMDB0013039	Prostaglandin G1	7.528807E-5	4.32033	2.11114	up
10.80_367.2151m/z	10.7966	367.215	HMDB0003235	Prostaglandin G2	3.602683E-7	5.90687	2.56239	up
12.93_441.2547m/z	12.928	441.255	HMDB0062591	Prostaglandin G2 2-glyceryl Ester	0.00878617	2.59254	1.37437	up
13.28_353.2343m/z	13.2823	353.234	HMDB0013041	Prostaglandin H1	2.425708E-5	3.33226	1.7365	up
18.94_427.7528m/z	18.9422	427.753	HMDB0112506	PS(18:4(6Z,9Z,12Z,15Z)/22:4(7Z,10Z,13Z,16Z))	0.00729198	2.04384	1.03128	up
8.44_424.7151m/z	8.44263	424.715	HMDB0280824	PS(PGE2/14:0)	0.0437661	2.18548	1.12795	up
0.86_128.0346m/z	0.859566	128.035	HMDB0000267	Pyroglutamic acid	1.3587038E-11	3.4734	1.79635	up
2.08_334.0734m/z	2.08242	334.073	HMDB0001550	S-Formylglutathione	0.00406221	2.43931	-1.28647	down
6.54_413.2407m/z	6.53952	413.241	HMDB0290435	SM(d17:2(4E,8Z)/20:5(7Z,9Z,11E,13E,17Z)-3OH(5,6,15))	0.0176962	3.21049	-1.68279	down
12.39_288.2895m/z	12.3917	288.289	CSID2497508	Sphinganine (d17:0)	3.6917666E-6	2.64344	-1.40242	down
14.86_300.2885m/z	14.8605	300.288	HMDB0000252	Sphingosine	0.0119544	2.47051	-1.30481	down
6.40_391.2145n	6.40237	207.605	HMDB0258419	sphingosine phosphate	0.0107172	3.34627	-1.74256	down
15.52_651.3451m/z	15.5165	651.345	SQDG(4:0/18:1)	SQDG(4:0/18:1)	5.933441E-6	2.56411	-1.35846	down
3.57_382.1042m/z	3.5681	382.104	HMDB0000912	Succinyladenosine	2.6594145E-7	3.53986	1.82369	up
13.79_290.6358m/z	13.7861	290.636	HMDB0002486	Taurochenodeoxycholate-3-sulfate	1.7167811E-5	3.0865	1.62597	up
12.84_239.1678m/z	12.8423	239.168	HMDB0000872	Tetradecanedioic acid	0.00375452	2.17584	1.12157	up
15.24_521.2488m/z	15.2423	521.249	HMDB0010357	Tetrahydroaldosterone-3-glucuronide	0.0318964	2.05013	-1.03571	down
0.83_1003.8836m/z	0.825283	1003.88	HMDB0043385	TG(15:0/24:1(15Z)/22:2(13Z,16Z))	0.00265195	2.12577	1.08799	up
12.56_356.2781m/z	12.5631	356.278	HMDB0241315	Tridec-6-enoylcarnitine	0.0367297	2.23525	1.16044	up
5.33_349.2668m/z	5.3281	349.267	HMDB0035477	Tridecyl phloretate	0.0159769	3.20512	-1.68038	down
17.74_662.1073m/z	17.7358	662.107	HMDB0011720	UDP-N-acetylmuraminate	0.00508033	3.98314	-1.99391	down
16.51_186.6091m/z	16.5067	186.609	HMDB0241163	Undec-8-enoylcarnitine	1.921715E-4	2.54047	1.3451	up
16.93_457.2994m/z	16.9337	457.299	HMDB0002195	Varanic acid	0.0466282	2.42958	1.2807	up
15.79_317.2134m/z	15.7908	317.213	HMDB0010212	17,18-EpETE	0.00204643	2.743	1.45575	up

## Sheet: Table S2
	Total	Expected	Hits	Raw p	#NAME?	Holm adjust	FDR	Impact
Arachidonic acid metabolism	44	1.0616	8	5.0453e-06	5.2971	0.00040362	0.00040362	0.32678
Sphingolipid metabolism	32	0.77206	4	0.0063831	2.195	0.50426	0.25532	0.11694
Steroid hormone biosynthesis	87	2.099	5	0.054411	1.2643	1	1	0.02548
Nitrogen metabolism	6	0.14476	1	0.13651	0.86484	1	1	0
Glutathione metabolism	28	0.67556	2	0.14486	0.83905	1	1	0.03001
Valine, leucine and isoleucine biosynthesis	8	0.19302	1	0.17784	0.74996	1	1	0
Ascorbate and aldarate metabolism	9	0.21714	1	0.19778	0.70382	1	1	0
Vitamin B6 metabolism	9	0.21714	HMDB0002327	0.19778	0.70382	1	1	0
Biosynthesis of unsaturated fatty acids	36	0.86857	2	0.21475	0.66807	1	1	0
Purine metabolism	70	1.6889	3	0.23672	0.62576	1	1	0.14008
Pyrimidine metabolism	39	0.94095	2	0.24184	0.61648	1	1	0
Valine, leucine and isoleucine degradation	40	0.96508	2	0.25092	0.60047	1	1	0.02264
Arginine biosynthesis	14	0.33778	1	0.29061	0.53668	1	1	0
Nicotinate and nicotinamide metabolism	15	0.3619	1	0.30788	0.51161	1	1	0.21053
Retinol metabolism	17	0.41016	1	0.3412	0.46699	1	1	0
Starch and sucrose metabolism	18	0.43429	1	0.35727	0.447	1	1	0.01826
Terpenoid backbone biosynthesis	18	0.43429	1	0.35727	0.447	1	1	0.11429
Pentose and glucuronate interconversions	19	0.45841	1	0.37296	0.42834	1	1	0.10843
Ether lipid metabolism	20	0.48254	1	0.38827	0.41087	1	1	0
Pantothenate and CoA biosynthesis	20	0.48254	1	0.38827	0.41087	1	1	0.0068
Fructose and mannose metabolism	20	0.48254	1	0.38827	0.41087	1	1	0.17598
Pentose phosphate pathway	23	0.55492	1	0.43206	0.36446	1	1	0.08868
Glycolysis / Gluconeogenesis	26	0.6273	1	0.47279	0.32533	1	1	0.06154
Alanine, aspartate and glutamate metabolism	28	0.67556	1	0.49835	0.30247	1	1	0.11378
Glyoxylate and dicarboxylate metabolism	32	0.77206	1	0.54589	0.26289	1	1	0
Tryptophan metabolism	41	0.98921	1	0.63739	0.19559	1	1	0.0139
Steroid biosynthesis	41	0.98921	1	0.63739	0.19559	1	1	0.06644
Tyrosine metabolism	42	1.0133	1	0.64638	0.18952	1	1	0.0127
Amino sugar and nucleotide sugar metabolism	42	1.0133	1	0.64638	0.18952	1	1	0.14122
